# Supplementary material for: Analysis of m7G-Related signatures in the tumour immune microenvironment and identification of clinical prognostic regulators in breast cancer
Source: Springer Nature journal article supplement (doi:10.1186/s12885-023-11012-z), 2023-06-23
Supplement: MOESM1 [file 25530372]

## Supplementary Material S1: The primers sequences (5'-3')

---

### AGO2

Forward primer TCCACCTAGACCCGACTTTGG

Reverse primer GTGTTCCACGATTTCCCTGTT

### EIF4E3

Forward primer GCAAAGGGTGGCGTATGGAA

Reverse primer CCCGATGGTTGCTAACAGC

### EIF4E

Forward primer GAAACCACCCCTACTCCTAATCC

Reverse primer AGAGTGCCCATCTGTTCTGTA

### DCPS

Forward primer GCAGCTCCTCAACTAGGCAAG

Reverse primer GAAGCCGGAGAACGGTAAGC

---

## Supplementary Material S2: Expression of 24 m7GRGs in RNA-seq.

| gene   | conMean  | treatMean | logFC    | pValue   | fdr      |
|--------|----------|-----------|----------|----------|----------|
| DCP2   | 2.497743 | 2.548924  | 0.029263 | 0.430586 | 0.449307 |
| IFIT5  | 3.068548 | 3.122906  | 0.025333 | 0.711143 | 0.711143 |
| EIF3D  | 6.184146 | 5.808371  | -0.09044 | 3.76E-13 | 7.51E-13 |
| EIF4G3 | 3.400347 | 3.458298  | 0.02438  | 0.10058  | 0.120696 |
| NSUN2  | 3.613179 | 4.002495  | 0.147631 | 1.03E-17 | 2.25E-17 |
| GEMIN5 | 3.040677 | 2.931432  | -0.05279 | 0.005423 | 0.007231 |
| AGO2   | 2.380648 | 2.373953  | -0.00406 | 0.109148 | 0.124741 |
| NUDT10 | 0.902379 | 0.785625  | -0.19989 | 2.10E-06 | 3.36E-06 |
| EIF4E  | 1.719527 | 1.916329  | 0.156333 | 1.89E-09 | 3.24E-09 |
| EIF4E2 | 3.160464 | 3.437258  | 0.121122 | 8.78E-25 | 5.27E-24 |
| NCBP2  | 4.077928 | 4.472261  | 0.133168 | 9.58E-27 | 7.66E-26 |
| NUDT11 | 1.209852 | 0.818136  | -0.56442 | 7.16E-22 | 2.45E-21 |
| NUDT3  | 0.056035 | 0.109145  | 0.961855 | 2.22E-18 | 5.33E-18 |
| NCBP1  | 3.189531 | 3.569618  | 0.162425 | 1.39E-20 | 3.70E-20 |
| METTL1 | 2.602957 | 3.241659  | 0.316581 | 7.95E-30 | 9.54E-29 |
| LARP1  | 4.64933  | 4.897966  | 0.07516  | 6.24E-11 | 1.15E-10 |
| NUDT4  | 2.649405 | 2.547042  | -0.05685 | 0.022936 | 0.028972 |
| EIF4E3 | 2.854685 | 2.022631  | -0.4971  | 1.44E-44 | 3.45E-43 |
| SNUPN  | 2.011552 | 1.984982  | -0.01918 | 0.241631 | 0.263597 |
| WDR4   | 1.852233 | 2.375233  | 0.358803 | 9.94E-22 | 2.98E-21 |
| LSM1   | 2.515897 | 3.105072  | 0.303554 | 1.98E-24 | 9.50E-24 |
| NUDT16 | 3.407635 | 2.991726  | -0.18779 | 1.09E-23 | 4.35E-23 |
| DCPS   | 1.884296 | 2.048251  | 0.120367 | 0.00024  | 0.000338 |
| CYFIP1 | 4.316232 | 4.167891  | -0.05046 | 1.57E-05 | 2.35E-05 |

## Supplementary Material S3: The changes of DNA methylation in 18 m7GRGs

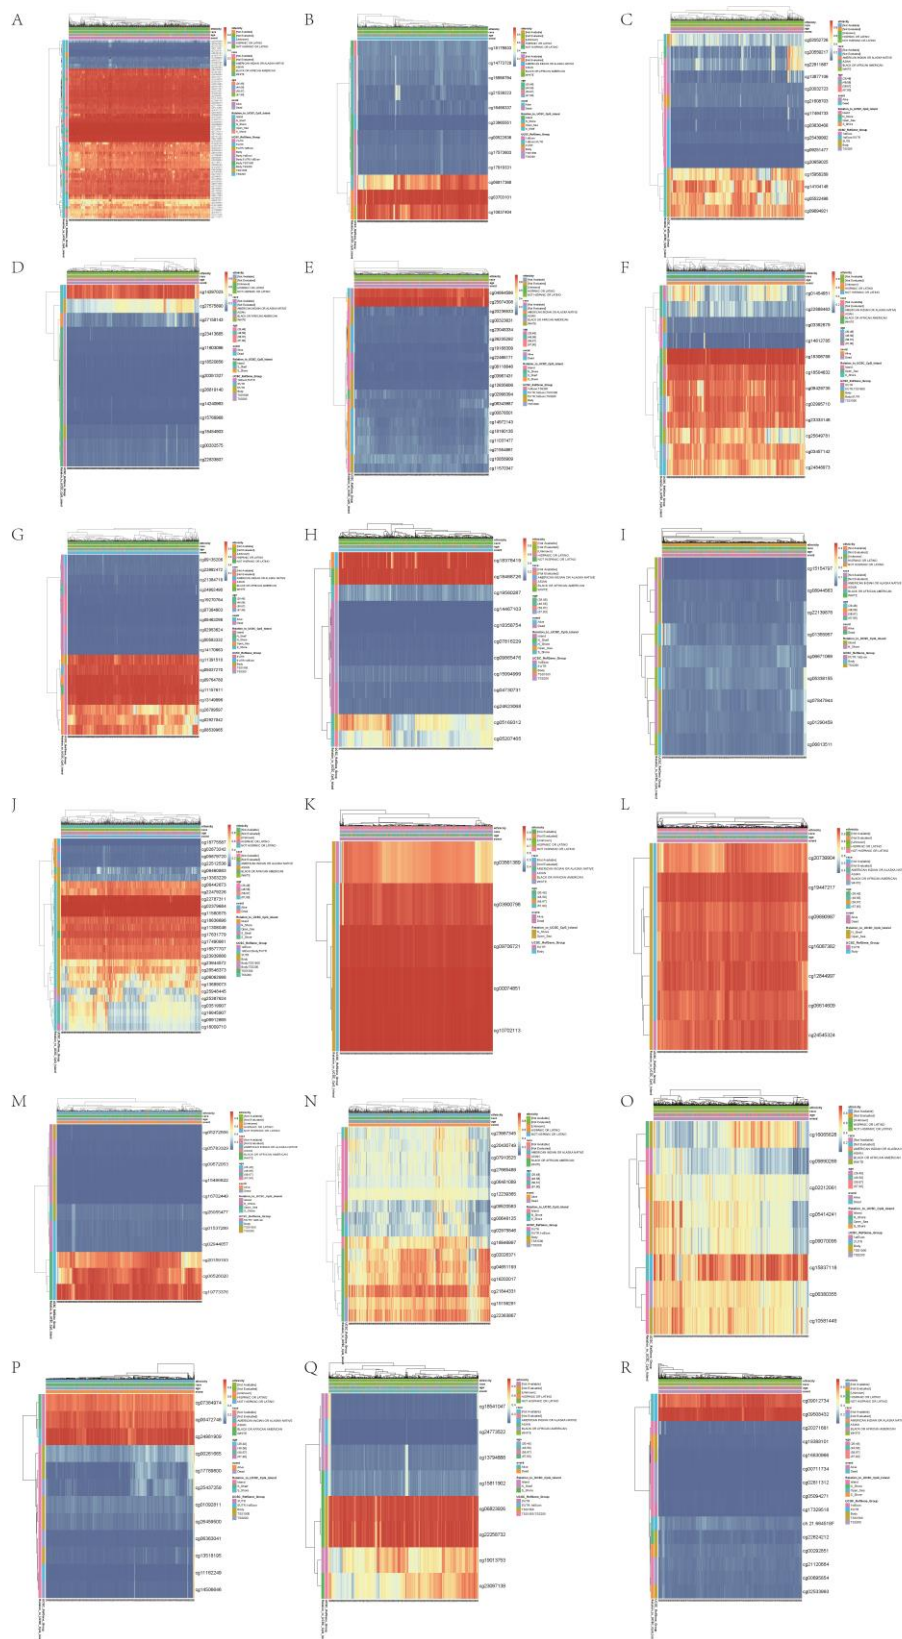

Figure 1 The changes of DNA methylation in 18 m7GRGs: CYFIP1(A), DCP2 (B), DCPS (C), EIF3D (D), EIF4E (E), EIF4E3 (F), EIF4G3 (G), GEMIN5 (H), IFIT5 (I), LARP1 (J), NCBP2 (K), NSUN2 (L), NUDT3 (M), NUDT10 (N), NUDT11 (O), NUDT16 (P), SNUPN (Q), WDR4 (R).

**Supplementary Material S4: Cluster results of TCGA-BRCA queue.**

| sample           | Subtype |
|------------------|---------|
| TCGA-A8-A08A-01A | C1      |
| TCGA-A8-A0A7-01A | C1      |
| TCGA-A8-A09W-01A | C1      |
| TCGA-A8-A08L-01A | C1      |
| TCGA-E9-A1RD-01A | C1      |
| TCGA-AC-A8OR-01A | C1      |
| TCGA-AN-A04C-01A | C1      |
| TCGA-E9-A248-01A | C1      |
| TCGA-BH-A0E0-01A | C1      |
| TCGA-AR-A0TR-01A | C1      |
| TCGA-AN-A0XL-01A | C1      |
| TCGA-BH-A0RX-01A | C1      |
| TCGA-AN-A0XW-01A | C1      |
| TCGA-AC-A3EH-01A | C1      |
| TCGA-E9-A249-01A | C1      |
| TCGA-AN-A0AK-01A | C1      |
| TCGA-AN-A0FL-01A | C1      |
| TCGA-AN-A0FJ-01A | C1      |
| TCGA-A8-A07S-01A | C1      |
| TCGA-E2-A1LK-01A | C1      |
| TCGA-A8-A07R-01A | C1      |
| TCGA-E2-A15O-01A | C1      |
| TCGA-BH-A0E6-01A | C1      |
| TCGA-C8-A278-01A | C1      |
| TCGA-D8-A27R-01A | C1      |
| TCGA-A7-A6VX-01A | C1      |
| TCGA-BH-A0GZ-01A | C1      |
| TCGA-A7-A5ZX-01A | C1      |
| TCGA-A7-A3J1-01A | C1      |
| TCGA-C8-A12M-01A | C1      |
| TCGA-C8-A12P-01A | C1      |
| TCGA-JL-A3YW-01A | C1      |
| TCGA-B6-A0I9-01A | C1      |
| TCGA-A7-A5ZV-01A | C1      |
| TCGA-C8-A130-01A | C1      |
| TCGA-EW-A1IW-01A | C1      |
| TCGA-C8-A1HM-01A | C1      |
| TCGA-C8-A138-01A | C1      |
| TCGA-D8-A27V-01A | C1      |
| TCGA-C8-A12V-01A | C1      |
| TCGA-C8-A12O-01A | C1      |

|                  |    |
|------------------|----|
| TCGA-E2-A15H-01A | C1 |
| TCGA-C8-A135-01A | C1 |
| TCGA-C8-A1HN-01A | C1 |
| TCGA-D8-A27H-01A | C1 |
| TCGA-D8-A1JT-01A | C1 |
| TCGA-A7-A3RF-01A | C1 |
| TCGA-C8-A8HR-01A | C1 |
| TCGA-D8-A27G-01A | C1 |
| TCGA-D8-A145-01A | C1 |
| TCGA-AC-A6IW-01A | C1 |
| TCGA-BH-A0HP-01A | C1 |
| TCGA-AC-A62X-01A | C1 |
| TCGA-S3-AA11-01A | C1 |
| TCGA-BH-A0DK-01A | C1 |
| TCGA-D8-A142-01A | C1 |
| TCGA-D8-A1JH-01A | C1 |
| TCGA-E2-A15S-01A | C1 |
| TCGA-OL-A66P-01A | C1 |
| TCGA-D8-A1Y3-01A | C1 |
| TCGA-BH-A0E2-01A | C1 |
| TCGA-A7-A4SD-01A | C1 |
| TCGA-AC-A2QJ-01A | C1 |
| TCGA-E2-A158-01A | C1 |
| TCGA-AC-A3OD-01B | C1 |
| TCGA-A8-A09V-01A | C1 |
| TCGA-BH-A0H0-01A | C1 |
| TCGA-EW-A6S9-01A | C1 |
| TCGA-BH-A18N-01A | C1 |
| TCGA-AC-A3W7-01A | C1 |
| TCGA-BH-A0E1-01A | C1 |
| TCGA-XX-A89A-01A | C1 |
| TCGA-BH-A0DZ-01A | C1 |
| TCGA-D8-A1XS-01A | C1 |
| TCGA-AC-A3HN-01A | C1 |
| TCGA-D8-A27L-01A | C1 |
| TCGA-D8-A1XY-01A | C1 |
| TCGA-AC-A3W5-01A | C1 |
| TCGA-BH-A0HN-01A | C1 |
| TCGA-A2-A0T1-01A | C1 |
| TCGA-A2-A1FW-01A | C1 |
| TCGA-S3-AA14-01A | C1 |
| TCGA-D8-A27E-01A | C1 |
| TCGA-A2-A0T5-01A | C1 |

|                  |    |
|------------------|----|
| TCGA-EW-A423-01A | C1 |
| TCGA-A8-A082-01A | C1 |
| TCGA-D8-A1XB-01A | C1 |
| TCGA-EW-A1P6-01A | C1 |
| TCGA-S3-A6ZG-01A | C1 |
| TCGA-AC-A6IV-01A | C1 |
| TCGA-B6-A0IK-01A | C1 |
| TCGA-BH-A8FZ-01A | C1 |
| TCGA-EW-A1PA-01A | C1 |
| TCGA-BH-A1FG-01A | C1 |
| TCGA-A2-A1G1-01A | C1 |
| TCGA-S3-AA10-01A | C1 |
| TCGA-AC-A5XS-01A | C1 |
| TCGA-D8-A1JM-01A | C1 |
| TCGA-A2-A1G4-01A | C1 |
| TCGA-LL-A8F5-01A | C1 |
| TCGA-A8-A08G-01A | C1 |
| TCGA-BH-A2L8-01A | C1 |
| TCGA-A7-A13E-01B | C1 |
| TCGA-A2-A1G0-01A | C1 |
| TCGA-AR-A2LH-01A | C1 |
| TCGA-D8-A1JN-01A | C1 |
| TCGA-OL-A5S0-01A | C1 |
| TCGA-E2-A15L-01A | C1 |
| TCGA-A7-A26J-01A | C1 |
| TCGA-E2-A15E-01A | C1 |
| TCGA-A2-A0T7-01A | C1 |
| TCGA-BH-A42V-01A | C1 |
| TCGA-A2-A4S2-01A | C1 |
| TCGA-D8-A146-01A | C1 |
| TCGA-BH-A18H-01A | C1 |
| TCGA-E2-A15F-01A | C1 |
| TCGA-D8-A4Z1-01A | C1 |
| TCGA-BH-A0BJ-01A | C1 |
| TCGA-A2-A4S3-01A | C1 |
| TCGA-A2-A1FZ-01A | C1 |
| TCGA-BH-A0WA-01A | C1 |
| TCGA-BH-A0H7-01A | C1 |
| TCGA-A2-A4S0-01A | C1 |
| TCGA-OL-A66I-01A | C1 |
| TCGA-A2-A1FV-01A | C1 |
| TCGA-BH-A5J0-01A | C1 |
| TCGA-A7-A13G-01B | C1 |

|                  |    |
|------------------|----|
| TCGA-A7-A26G-01A | C1 |
| TCGA-E9-A54Y-01A | C1 |
| TCGA-BH-A0EB-01A | C1 |
| TCGA-BH-A0H6-01A | C1 |
| TCGA-AC-A3YJ-01A | C1 |
| TCGA-E9-A1QZ-01A | C1 |
| TCGA-EW-A6SB-01A | C1 |
| TCGA-A7-A13F-01A | C1 |
| TCGA-D8-A73X-01A | C1 |
| TCGA-A2-A0D4-01A | C1 |
| TCGA-D8-A1X8-01A | C1 |
| TCGA-BH-A1F0-01A | C1 |
| TCGA-E9-A1NG-01A | C1 |
| TCGA-A8-A06Y-01A | C1 |
| TCGA-BH-A202-01A | C1 |
| TCGA-E9-A5UP-01A | C1 |
| TCGA-OL-A66H-01A | C1 |
| TCGA-AQ-A04J-01A | C1 |
| TCGA-D8-A1XA-01A | C1 |
| TCGA-BH-A201-01A | C1 |
| TCGA-B6-A0X4-01A | C1 |
| TCGA-A7-A0DC-01A | C1 |
| TCGA-A7-A0DC-01B | C1 |
| TCGA-EW-A1P4-01A | C1 |
| TCGA-EW-A1OX-01A | C1 |
| TCGA-BH-A0DI-01A | C1 |
| TCGA-A8-A09K-01A | C1 |
| TCGA-A2-A3XU-01A | C1 |
| TCGA-BH-A18P-01A | C1 |
| TCGA-E2-A570-01A | C1 |
| TCGA-A8-A08P-01A | C1 |
| TCGA-A8-A06X-01A | C1 |
| TCGA-A7-A26E-01A | C1 |
| TCGA-BH-A1F2-01A | C1 |
| TCGA-A2-A0EV-01A | C1 |
| TCGA-BH-A0BC-01A | C1 |
| TCGA-AQ-A1H3-01A | C1 |
| TCGA-A2-A0YC-01A | C1 |
| TCGA-B6-A0I6-01A | C1 |
| TCGA-A2-A3XV-01A | C1 |
| TCGA-LL-A441-01A | C1 |
| TCGA-AO-A0J2-01A | C1 |
| TCGA-BH-A18F-01A | C1 |

|                  |    |
|------------------|----|
| TCGA-AQ-A54O-01A | C1 |
| TCGA-A8-A08F-01A | C1 |
| TCGA-E2-A1B4-01A | C1 |
| TCGA-AC-A2QH-01B | C1 |
| TCGA-A7-A0DB-01C | C1 |
| TCGA-EW-A6SD-01A | C1 |
| TCGA-E9-A1N8-01A | C1 |
| TCGA-A2-A0EU-01A | C1 |
| TCGA-E9-A1NF-01A | C1 |
| TCGA-BH-A18I-01A | C1 |
| TCGA-E9-A1N5-01A | C1 |
| TCGA-BH-A28O-01A | C1 |
| TCGA-A8-A08J-01A | C1 |
| TCGA-AO-A0J6-01A | C1 |
| TCGA-E2-A10B-01A | C1 |
| TCGA-GM-A3NY-01A | C1 |
| TCGA-A7-A0CD-01A | C1 |
| TCGA-E9-A22B-01A | C1 |
| TCGA-E9-A22A-01A | C1 |
| TCGA-A1-A0SN-01A | C1 |
| TCGA-BH-A0B3-01A | C1 |
| TCGA-A2-A3KD-01A | C1 |
| TCGA-EW-A1P1-01A | C1 |
| TCGA-EW-A1OZ-01A | C1 |
| TCGA-AO-A12H-01A | C1 |
| TCGA-EW-A1P0-01A | C1 |
| TCGA-E9-A1ND-01A | C1 |
| TCGA-AR-A1AT-01A | C1 |
| TCGA-A8-A095-01A | C1 |
| TCGA-E9-A228-01A | C1 |
| TCGA-E2-A1LL-01A | C1 |
| TCGA-BH-A0BF-01A | C1 |
| TCGA-GM-A3XG-01A | C1 |
| TCGA-AO-A03V-01A | C1 |
| TCGA-E2-A14O-01A | C1 |
| TCGA-BH-A0E7-01A | C1 |
| TCGA-E9-A1RA-01A | C1 |
| TCGA-BH-A1FM-01A | C1 |
| TCGA-E9-A1RH-01A | C1 |
| TCGA-E9-A1RE-01A | C1 |
| TCGA-A1-A0SH-01A | C1 |
| TCGA-A1-A0SF-01A | C1 |
| TCGA-A2-A0CO-01A | C1 |

|                  |    |
|------------------|----|
| TCGA-5L-AAT1-01A | C1 |
| TCGA-3C-AALJ-01A | C1 |
| TCGA-BH-A1EX-01A | C1 |
| TCGA-AO-A0JI-01A | C1 |
| TCGA-A2-A3XZ-01A | C1 |
| TCGA-AO-A0JB-01A | C1 |
| TCGA-AO-A0JC-01A | C1 |
| TCGA-A2-A259-01A | C1 |
| TCGA-D8-A1JG-01B | C1 |
| TCGA-AO-A0J9-01A | C1 |
| TCGA-E2-A1L6-01A | C1 |
| TCGA-EW-A2FR-01A | C1 |
| TCGA-A2-A0CY-01A | C1 |
| TCGA-D8-A1XO-01A | C1 |
| TCGA-BH-A1FU-01A | C1 |
| TCGA-E2-A15I-01A | C1 |
| TCGA-A2-A3XW-01A | C1 |
| TCGA-AR-A2LR-01A | C1 |
| TCGA-BH-A208-01A | C1 |
| TCGA-OL-A5D7-01A | C1 |
| TCGA-OL-A5DA-01A | C1 |
| TCGA-GM-A2D9-01A | C1 |
| TCGA-E2-A1L7-01A | C1 |
| TCGA-AR-A1AV-01A | C1 |
| TCGA-HN-A2OB-01A | C1 |
| TCGA-BH-A0AZ-01A | C1 |
| TCGA-A2-A0EY-01A | C1 |
| TCGA-AR-A0U0-01A | C1 |
| TCGA-OL-A66J-01A | C1 |
| TCGA-V7-A7HQ-01A | C1 |
| TCGA-A2-A0D0-01A | C1 |
| TCGA-B6-A408-01A | C1 |
| TCGA-B6-A0RG-01A | C1 |
| TCGA-AO-A03R-01A | C1 |
| TCGA-BH-A0B5-01A | C1 |
| TCGA-AO-A0JM-01A | C1 |
| TCGA-A2-A0ES-01A | C1 |
| TCGA-GM-A4E0-01A | C1 |
| TCGA-BH-A1FN-01A | C1 |
| TCGA-AC-A2BK-01A | C1 |
| TCGA-E2-A1L8-01A | C1 |
| TCGA-BH-A0BZ-01A | C1 |
| TCGA-A2-A0ER-01A | C1 |



|                  |    |
|------------------|----|
| TCGA-B6-A402-01A | C1 |
| TCGA-GM-A2DD-01A | C1 |
| TCGA-A2-A0CT-01A | C1 |
| TCGA-E2-A1IE-01A | C1 |
| TCGA-BH-A0BW-01A | C1 |
| TCGA-BH-A0DE-01A | C1 |
| TCGA-AR-A1AJ-01A | C1 |
| TCGA-AO-A03L-01A | C1 |
| TCGA-B6-A0RL-01A | C1 |
| TCGA-BH-A0DD-01A | C1 |
| TCGA-AO-A1KR-01A | C1 |
| TCGA-BH-A1ET-01A | C1 |
| TCGA-AR-A0TS-01A | C1 |
| TCGA-B6-A401-01A | C1 |
| TCGA-AR-A254-01A | C1 |
| TCGA-A2-A04U-01A | C1 |
| TCGA-A2-A0CQ-01A | C1 |
| TCGA-BH-A0C3-01A | C1 |
| TCGA-BH-A0C7-01B | C1 |
| TCGA-A2-A3XT-01A | C1 |
| TCGA-A2-A0CP-01A | C1 |
| TCGA-B6-A0IH-01A | C1 |
| TCGA-AR-A1AM-01A | C1 |
| TCGA-AR-A24Z-01A | C1 |
| TCGA-AR-A24X-01A | C1 |
| TCGA-AR-A0TW-01A | C1 |
| TCGA-A2-A0CL-01A | C1 |
| TCGA-AO-A12A-01A | C1 |
| TCGA-E2-A1LI-01A | C1 |
| TCGA-GM-A2DM-01A | C1 |
| TCGA-E2-A1LH-01A | C1 |
| TCGA-AO-A129-01A | C1 |
| TCGA-AR-A0TT-01A | C1 |
| TCGA-GM-A3NW-01A | C1 |
| TCGA-BH-A42U-01A | C1 |
| TCGA-AO-A125-01A | C1 |
| TCGA-BH-A1FC-01A | C1 |
| TCGA-AO-A124-01A | C1 |
| TCGA-B6-A0IM-01A | C1 |
| TCGA-B6-A0X0-01A | C1 |
| TCGA-B6-A1KN-01A | C1 |
| TCGA-B6-A0RQ-01A | C1 |
| TCGA-A2-A04N-01A | C1 |

|                  |    |
|------------------|----|
| TCGA-B6-A0IG-01A | C1 |
| TCGA-AR-A2LE-01A | C1 |
| TCGA-GM-A2DA-01A | C1 |
| TCGA-B6-A0RN-01A | C1 |
| TCGA-A8-A08R-01A | C2 |
| TCGA-A8-A09N-01A | C2 |
| TCGA-AC-A8OQ-01A | C2 |
| TCGA-D8-A27P-01A | C2 |
| TCGA-AC-A6NO-01A | C2 |
| TCGA-AQ-A54N-01A | C2 |
| TCGA-HN-A2NL-01A | C2 |
| TCGA-AN-A04A-01A | C2 |
| TCGA-E2-A1IL-01A | C2 |
| TCGA-BH-A0HK-01A | C2 |
| TCGA-EW-A1PC-01B | C2 |
| TCGA-AN-A0FS-01A | C2 |
| TCGA-AN-A0FK-01A | C2 |
| TCGA-AN-A0FT-01A | C2 |
| TCGA-B6-A400-01A | C2 |
| TCGA-GI-A2C8-01A | C2 |
| TCGA-AN-A0AL-01A | C2 |
| TCGA-LL-A73Z-01A | C2 |
| TCGA-A2-A0T2-01A | C2 |
| TCGA-AN-A0AJ-01A | C2 |
| TCGA-A8-A07O-01A | C2 |
| TCGA-A8-A07W-01A | C2 |
| TCGA-A7-A6VV-01A | C2 |
| TCGA-A7-A3J0-01A | C2 |
| TCGA-C8-A1HL-01A | C2 |
| TCGA-EW-A1PE-01A | C2 |
| TCGA-BH-A42T-01A | C2 |
| TCGA-AR-A5QQ-01A | C2 |
| TCGA-A2-A25F-01A | C2 |
| TCGA-A7-A3IZ-01A | C2 |
| TCGA-A7-A5ZW-01A | C2 |
| TCGA-E2-A15M-01A | C2 |
| TCGA-E9-A1R6-01A | C2 |
| TCGA-C8-A1HG-01A | C2 |
| TCGA-W8-A86G-01A | C2 |
| TCGA-4H-AAAK-01A | C2 |
| TCGA-AO-A1KS-01A | C2 |
| TCGA-C8-A12N-01A | C2 |
| TCGA-C8-A12L-01A | C2 |

|                  |    |
|------------------|----|
| TCGA-A8-A09B-01A | C2 |
| TCGA-D8-A1JS-01A | C2 |
| TCGA-C8-A26X-01A | C2 |
| TCGA-LL-A7T0-01A | C2 |
| TCGA-D8-A1XC-01A | C2 |
| TCGA-C8-A8HQ-01A | C2 |
| TCGA-BH-A0HU-01A | C2 |
| TCGA-A8-A086-01A | C2 |
| TCGA-LD-A74U-01A | C2 |
| TCGA-C8-A131-01A | C2 |
| TCGA-A7-A4SB-01A | C2 |
| TCGA-EW-A1PD-01A | C2 |
| TCGA-A8-A09X-01A | C2 |
| TCGA-D8-A143-01A | C2 |
| TCGA-D8-A1J8-01A | C2 |
| TCGA-A1-A0SG-01A | C2 |
| TCGA-EW-A1PF-01A | C2 |
| TCGA-LL-A740-01A | C2 |
| TCGA-D8-A1XK-01A | C2 |
| TCGA-A7-A425-01A | C2 |
| TCGA-D8-A1JU-01A | C2 |
| TCGA-A8-A084-01A | C2 |
| TCGA-XX-A899-01A | C2 |
| TCGA-C8-A26Z-01A | C2 |
| TCGA-EW-A1J5-01A | C2 |
| TCGA-LL-A73Y-01A | C2 |
| TCGA-D8-A1JC-01A | C2 |
| TCGA-D8-A1XR-01A | C2 |
| TCGA-D8-A1XQ-01A | C2 |
| TCGA-EW-A1J3-01A | C2 |
| TCGA-EW-A6SA-01A | C2 |
| TCGA-A8-A0AB-01A | C2 |
| TCGA-LL-A5YL-01A | C2 |
| TCGA-D8-A1XD-01A | C2 |
| TCGA-EW-A3U0-01A | C2 |
| TCGA-D8-A1J9-01A | C2 |
| TCGA-A7-A4SF-01A | C2 |
| TCGA-A8-A06R-01A | C2 |
| TCGA-A2-A04P-01A | C2 |
| TCGA-D8-A1JD-01A | C2 |
| TCGA-E2-A15G-01A | C2 |
| TCGA-A1-A0SQ-01A | C2 |
| TCGA-D8-A3Z6-01A | C2 |

|                  |    |
|------------------|----|
| TCGA-A2-A0YJ-01A | C2 |
| TCGA-S3-A6ZF-01A | C2 |
| TCGA-B6-A409-01A | C2 |
| TCGA-D8-A1JE-01A | C2 |
| TCGA-EW-A1J1-01A | C2 |
| TCGA-A8-A07F-01A | C2 |
| TCGA-D8-A1JI-01A | C2 |
| TCGA-A1-A0SP-01A | C2 |
| TCGA-A2-A0YK-01A | C2 |
| TCGA-E2-A154-01A | C2 |
| TCGA-OL-A6VQ-01A | C2 |
| TCGA-D8-A1XL-01A | C2 |
| TCGA-EW-A1PB-01A | C2 |
| TCGA-D8-A1JL-01A | C2 |
| TCGA-D8-A1JJ-01A | C2 |
| TCGA-BH-A18J-01A | C2 |
| TCGA-AC-A8OP-01A | C2 |
| TCGA-AO-A1KO-01A | C2 |
| TCGA-A2-A0T4-01A | C2 |
| TCGA-A7-A26J-01B | C2 |
| TCGA-A1-A0SI-01A | C2 |
| TCGA-D8-A1JP-01A | C2 |
| TCGA-B6-A0WX-01A | C2 |
| TCGA-S3-A6ZH-01A | C2 |
| TCGA-A7-A4SE-01A | C2 |
| TCGA-LD-A66U-01A | C2 |
| TCGA-E9-A1RG-01A | C2 |
| TCGA-A2-A4RY-01A | C2 |
| TCGA-A2-A0YH-01A | C2 |
| TCGA-BH-A8G0-01A | C2 |
| TCGA-A2-A0YG-01A | C2 |
| TCGA-EW-A2FW-01A | C2 |
| TCGA-AC-A2B8-01A | C2 |
| TCGA-A7-A2KD-01A | C2 |
| TCGA-AO-A0J8-01A | C2 |
| TCGA-EW-A1OW-01A | C2 |
| TCGA-E2-A153-01A | C2 |
| TCGA-A2-A0YT-01A | C2 |
| TCGA-A7-A26H-01A | C2 |
| TCGA-A2-A4RX-01A | C2 |
| TCGA-C8-A27A-01A | C2 |
| TCGA-AQ-A04H-01B | C2 |
| TCGA-BH-A0W4-01A | C2 |

|                  |    |
|------------------|----|
| TCGA-A8-A07U-01A | C2 |
| TCGA-LL-A50Y-01A | C2 |
| TCGA-E2-A159-01A | C2 |
| TCGA-EW-A2FV-01A | C2 |
| TCGA-EW-A1OV-01A | C2 |
| TCGA-AC-A2FM-01A | C2 |
| TCGA-OL-A66N-01A | C2 |
| TCGA-AO-A0J5-01A | C2 |
| TCGA-E9-A5FK-01A | C2 |
| TCGA-A2-A4S1-01A | C2 |
| TCGA-BH-A0HX-01A | C2 |
| TCGA-E9-A6HE-01A | C2 |
| TCGA-LQ-A4E4-01A | C2 |
| TCGA-E2-A1IJ-01A | C2 |
| TCGA-EW-A1J6-01A | C2 |
| TCGA-E2-A10F-01A | C2 |
| TCGA-E2-A1LE-01A | C2 |
| TCGA-A8-A06U-01A | C2 |
| TCGA-LL-A442-01A | C2 |
| TCGA-A7-A13H-01A | C2 |
| TCGA-E9-A3X8-01A | C2 |
| TCGA-A8-A092-01A | C2 |
| TCGA-A7-A13D-01B | C2 |
| TCGA-A7-A13D-01A | C2 |
| TCGA-A1-A0SK-01A | C2 |
| TCGA-E9-A1RB-01A | C2 |
| TCGA-AC-A3BB-01A | C2 |
| TCGA-E9-A1N4-01A | C2 |
| TCGA-A8-A091-01A | C2 |
| TCGA-A8-A07C-01A | C2 |
| TCGA-EW-A3E8-01B | C2 |
| TCGA-E2-A576-01A | C2 |
| TCGA-A7-A0CG-01A | C2 |
| TCGA-E2-A107-01A | C2 |
| TCGA-E9-A226-01A | C2 |
| TCGA-EW-A1PG-01A | C2 |
| TCGA-E9-A1N3-01A | C2 |
| TCGA-A7-A0CE-01A | C2 |
| TCGA-A7-A0CH-01A | C2 |
| TCGA-A2-A3XY-01A | C2 |
| TCGA-A2-A04Y-01A | C2 |
| TCGA-E9-A1N9-01A | C2 |
| TCGA-A2-A3KC-01A | C2 |

|                  |    |
|------------------|----|
| TCGA-E9-A1NA-01A | C2 |
| TCGA-A8-A085-01A | C2 |
| TCGA-E2-A1BD-01A | C2 |
| TCGA-E2-A1IF-01A | C2 |
| TCGA-E9-A229-01A | C2 |
| TCGA-BH-A0B1-01A | C2 |
| TCGA-AR-A1AS-01A | C2 |
| TCGA-B6-A3ZX-01A | C2 |
| TCGA-E9-A3HO-01A | C2 |
| TCGA-E2-A14Q-01A | C2 |
| TCGA-E2-A574-01A | C2 |
| TCGA-AR-A5QP-01A | C2 |
| TCGA-EW-A1IX-01A | C2 |
| TCGA-E2-A10C-01A | C2 |
| TCGA-BH-A0H9-01A | C2 |
| TCGA-OL-A66K-01A | C2 |
| TCGA-BH-A0W5-01A | C2 |
| TCGA-OL-A66L-01A | C2 |
| TCGA-A1-A0SE-01A | C2 |
| TCGA-A2-A0SY-01A | C2 |
| TCGA-BH-A0W7-01A | C2 |
| TCGA-A2-A0SW-01A | C2 |
| TCGA-A8-A07Z-01A | C2 |
| TCGA-PE-A5DC-01A | C2 |
| TCGA-3C-AALK-01A | C2 |
| TCGA-A2-A0YL-01A | C2 |
| TCGA-5L-AAT0-01A | C2 |
| TCGA-A2-A0YF-01A | C2 |
| TCGA-BH-A0HY-01A | C2 |
| TCGA-BH-A18V-01A | C2 |
| TCGA-E2-A1LS-01A | C2 |
| TCGA-WT-AB41-01A | C2 |
| TCGA-A2-A0CZ-01A | C2 |
| TCGA-BH-A0H5-01A | C2 |
| TCGA-E2-A15J-01A | C2 |
| TCGA-BH-A1FR-01A | C2 |
| TCGA-BH-A0DO-01B | C2 |
| TCGA-AO-A0JL-01A | C2 |
| TCGA-A2-A04X-01A | C2 |
| TCGA-E2-A1IK-01A | C2 |
| TCGA-A2-A1FX-01A | C2 |
| TCGA-E2-A1IO-01A | C2 |
| TCGA-AO-A03M-01B | C2 |

|                  |    |
|------------------|----|
| TCGA-BH-A0BG-01A | C2 |
| TCGA-AO-A1KQ-01A | C2 |
| TCGA-AO-A0JJ-01A | C2 |
| TCGA-BH-A0EI-01A | C2 |
| TCGA-BH-A0H3-01A | C2 |
| TCGA-E2-A150-01A | C2 |
| TCGA-BH-A18S-01A | C2 |
| TCGA-AR-A2LL-01A | C2 |
| TCGA-GM-A3XN-01A | C2 |
| TCGA-B6-A0X5-01A | C2 |
| TCGA-GM-A3XL-01A | C2 |
| TCGA-BH-A0DX-01A | C2 |
| TCGA-B6-A40C-01A | C2 |
| TCGA-AO-A0JD-01A | C2 |
| TCGA-GM-A2DH-01A | C2 |
| TCGA-BH-A0BO-01A | C2 |
| TCGA-AR-A5QM-01A | C2 |
| TCGA-A2-A04T-01A | C2 |
| TCGA-BH-A0BQ-01A | C2 |
| TCGA-BH-A0BP-01A | C2 |
| TCGA-A2-A0CS-01A | C2 |
| TCGA-B6-A0I1-01A | C2 |
| TCGA-BH-A0BT-01A | C2 |
| TCGA-AO-A12C-01A | C2 |
| TCGA-B6-A0WV-01A | C2 |
| TCGA-A2-A0EO-01A | C2 |
| TCGA-AO-A03O-01A | C2 |
| TCGA-AO-A12D-01A | C2 |
| TCGA-BH-A204-01A | C2 |
| TCGA-E2-A106-01A | C2 |
| TCGA-AR-A0U2-01A | C2 |
| TCGA-GM-A2DO-01A | C2 |
| TCGA-AC-A2FE-01A | C2 |
| TCGA-AC-A2FK-01A | C2 |
| TCGA-AR-A250-01A | C2 |
| TCGA-BH-A18K-01A | C2 |
| TCGA-BH-A1EO-01A | C2 |
| TCGA-AR-A256-01A | C2 |
| TCGA-AR-A1AP-01A | C2 |
| TCGA-AO-A03P-01A | C2 |
| TCGA-AR-A1AN-01A | C2 |
| TCGA-AR-A24S-01A | C2 |
| TCGA-A2-A0ST-01A | C2 |

|                  |    |
|------------------|----|
| TCGA-AR-A1AQ-01A | C2 |
| TCGA-AC-A2BM-01A | C2 |
| TCGA-GM-A2DN-01A | C2 |
| TCGA-A2-A0EM-01A | C2 |
| TCGA-AR-A24U-01A | C2 |
| TCGA-AR-A24Q-01A | C2 |
| TCGA-AR-A24T-01A | C2 |
| TCGA-AO-A128-01A | C2 |
| TCGA-A2-A25A-01A | C2 |
| TCGA-A2-A0CW-01A | C2 |
| TCGA-Z7-A8R5-01A | C2 |
| TCGA-AR-A1AI-01A | C2 |
| TCGA-AO-A126-01A | C2 |
| TCGA-GI-A2C9-01A | C2 |
| TCGA-B6-A0WY-01A | C2 |
| TCGA-A2-A0EP-01A | C2 |
| TCGA-AR-A24M-01A | C2 |
| TCGA-BH-A1FB-01A | C2 |
| TCGA-BH-A209-01A | C2 |
| TCGA-3C-AALI-01A | C2 |
| TCGA-AR-A0U3-01A | C2 |
| TCGA-A2-A0EN-01A | C2 |
| TCGA-B6-A0IQ-01A | C2 |
| TCGA-B6-A0IO-01A | C2 |
| TCGA-B6-A0WZ-01A | C2 |
| TCGA-B6-A0RI-01A | C2 |
| TCGA-A8-A06Q-01A | C3 |
| TCGA-OK-A5Q2-01A | C3 |
| TCGA-BH-A0HO-01A | C3 |
| TCGA-E9-A1R3-01A | C3 |
| TCGA-BH-A0DS-01A | C3 |
| TCGA-LL-A6FQ-01A | C3 |
| TCGA-BH-A18G-01A | C3 |
| TCGA-A2-A0CU-01A | C3 |
| TCGA-BH-A6R9-01A | C3 |
| TCGA-AN-A0XV-01A | C3 |
| TCGA-E9-A1R4-01A | C3 |
| TCGA-AN-A0FD-01A | C3 |
| TCGA-E9-A1RF-01A | C3 |
| TCGA-BH-A18T-01A | C3 |
| TCGA-EW-A1P8-01A | C3 |
| TCGA-AC-A7VB-01A | C3 |
| TCGA-E2-A56Z-01A | C3 |



|                  |    |
|------------------|----|
| TCGA-A1-A0SB-01A | C3 |
| TCGA-A8-A09R-01A | C3 |
| TCGA-E2-A15K-01A | C3 |
| TCGA-BH-AB28-01A | C3 |
| TCGA-BH-A6R8-01A | C3 |
| TCGA-PL-A8LZ-01A | C3 |
| TCGA-5T-A9QA-01A | C3 |
| TCGA-LD-A9QF-01A | C3 |
| TCGA-A8-A07P-01A | C3 |
| TCGA-C8-A1HI-01A | C3 |
| TCGA-A7-A3IY-01A | C3 |
| TCGA-JL-A3YX-01A | C3 |
| TCGA-BH-A1EV-01A | C3 |
| TCGA-A8-A0A1-01A | C3 |
| TCGA-A8-A08I-01A | C3 |
| TCGA-A8-A07J-01A | C3 |
| TCGA-C8-A1HK-01A | C3 |
| TCGA-D8-A27W-01A | C3 |
| TCGA-AC-A6IX-01A | C3 |
| TCGA-C8-A1HE-01A | C3 |
| TCGA-E9-A295-01A | C3 |
| TCGA-C8-A137-01A | C3 |
| TCGA-C8-A26W-01A | C3 |
| TCGA-C8-A12Z-01A | C3 |
| TCGA-C8-A132-01A | C3 |
| TCGA-C8-A12W-01A | C3 |
| TCGA-D8-A73W-01A | C3 |
| TCGA-C8-A12X-01A | C3 |
| TCGA-C8-A12Q-01A | C3 |
| TCGA-C8-A12U-01A | C3 |
| TCGA-C8-A3M8-01A | C3 |
| TCGA-LL-A5YM-01A | C3 |
| TCGA-C8-A8HP-01A | C3 |
| TCGA-A8-A06P-01A | C3 |
| TCGA-A8-A06O-01A | C3 |
| TCGA-D8-A140-01A | C3 |
| TCGA-LD-A7W6-01A | C3 |
| TCGA-D8-A27M-01A | C3 |
| TCGA-A1-A0SJ-01A | C3 |
| TCGA-A8-A07I-01A | C3 |
| TCGA-D8-A1Y2-01A | C3 |
| TCGA-A7-A4SC-01A | C3 |
| TCGA-A7-A56D-01A | C3 |

|                  |    |
|------------------|----|
| TCGA-LL-A5YP-01A | C3 |
| TCGA-A7-A4SA-01A | C3 |
| TCGA-AC-A5XU-01A | C3 |
| TCGA-AC-A3TN-01A | C3 |
| TCGA-D8-A1XV-01A | C3 |
| TCGA-D8-A1XZ-01A | C3 |
| TCGA-D8-A1Y0-01A | C3 |
| TCGA-AQ-A1H2-01A | C3 |
| TCGA-BH-A0DP-01A | C3 |
| TCGA-D8-A27F-01A | C3 |
| TCGA-A2-A1G6-01A | C3 |
| TCGA-E2-A1BC-01A | C3 |
| TCGA-D8-A1XT-01A | C3 |
| TCGA-C8-A274-01A | C3 |
| TCGA-C8-A273-01A | C3 |
| TCGA-A8-A075-01A | C3 |
| TCGA-E2-A15D-01A | C3 |
| TCGA-OL-A66O-01A | C3 |
| TCGA-AC-A62Y-01A | C3 |
| TCGA-A2-A0T0-01A | C3 |
| TCGA-D8-A1XM-01A | C3 |
| TCGA-BH-A1EY-01A | C3 |
| TCGA-D8-A1X6-01A | C3 |
| TCGA-AO-A1KT-01A | C3 |
| TCGA-A8-A093-01A | C3 |
| TCGA-A2-A0YE-01A | C3 |
| TCGA-EW-A1IZ-01A | C3 |
| TCGA-E2-A14Z-01A | C3 |
| TCGA-D8-A1X5-01A | C3 |
| TCGA-S3-AA12-01A | C3 |
| TCGA-A2-A0T6-01A | C3 |
| TCGA-E9-A1NH-01A | C3 |
| TCGA-A8-A0A2-01A | C3 |
| TCGA-AC-A23C-01A | C3 |
| TCGA-EW-A1PH-01A | C3 |
| TCGA-E9-A243-01A | C3 |
| TCGA-C8-A26V-01A | C3 |
| TCGA-BH-A0AW-01A | C3 |
| TCGA-A8-A0A6-01A | C3 |
| TCGA-E2-A155-01A | C3 |
| TCGA-AO-A0J3-01A | C3 |
| TCGA-AO-A0JA-01A | C3 |
| TCGA-E2-A1IN-01A | C3 |

|                  |    |
|------------------|----|
| TCGA-AC-A3QP-01A | C3 |
| TCGA-MS-A51U-01A | C3 |
| TCGA-EW-A1P5-01A | C3 |
| TCGA-AC-A3YI-01A | C3 |
| TCGA-AR-A0TU-01A | C3 |
| TCGA-E2-A15A-01A | C3 |
| TCGA-EW-A424-01A | C3 |
| TCGA-E9-A54X-01A | C3 |
| TCGA-BH-A0HF-01A | C3 |
| TCGA-BH-A0W3-01A | C3 |
| TCGA-AC-A3QQ-01B | C3 |
| TCGA-A7-A26F-01B | C3 |
| TCGA-E2-A1LA-01A | C3 |
| TCGA-A2-A0CM-01A | C3 |
| TCGA-AC-A3TM-01A | C3 |
| TCGA-E9-A5UO-01A | C3 |
| TCGA-AO-A0JG-01A | C3 |
| TCGA-BH-A0HB-01A | C3 |
| TCGA-BH-A18L-01A | C3 |
| TCGA-E2-A2P5-01A | C3 |
| TCGA-A8-A0A9-01A | C3 |
| TCGA-A2-A0SV-01A | C3 |
| TCGA-E2-A108-01A | C3 |
| TCGA-A1-A0SO-01A | C3 |
| TCGA-E9-A1R0-01A | C3 |
| TCGA-E2-A10E-01A | C3 |
| TCGA-E2-A1B6-01A | C3 |
| TCGA-WT-AB44-01A | C3 |
| TCGA-E9-A2JS-01A | C3 |
| TCGA-E9-A3QA-01A | C3 |
| TCGA-BH-A0EE-01A | C3 |
| TCGA-EW-A6SC-01A | C3 |
| TCGA-A7-A26E-01B | C3 |
| TCGA-A2-A0YM-01A | C3 |
| TCGA-E2-A14X-01A | C3 |
| TCGA-E2-A14W-01A | C3 |
| TCGA-E9-A227-01A | C3 |
| TCGA-A8-A07L-01A | C3 |
| TCGA-E2-A1B5-01A | C3 |
| TCGA-BH-A0EA-01A | C3 |
| TCGA-A8-A08S-01A | C3 |
| TCGA-A8-A09M-01A | C3 |
| TCGA-A7-A0DB-01A | C3 |

|                  |    |
|------------------|----|
| TCGA-BH-A1FD-01A | C3 |
| TCGA-AR-A5QN-01A | C3 |
| TCGA-D8-A3Z5-01A | C3 |
| TCGA-E2-A1IH-01A | C3 |
| TCGA-A2-A3XS-01A | C3 |
| TCGA-C8-A3M7-01A | C3 |
| TCGA-E2-A14V-01A | C3 |
| TCGA-A2-A0D1-01A | C3 |
| TCGA-OL-A5RV-01A | C3 |
| TCGA-E2-A573-01A | C3 |
| TCGA-E9-A1R2-01A | C3 |
| TCGA-A7-A0DA-01A | C3 |
| TCGA-OL-A5D6-01A | C3 |
| TCGA-BH-A28Q-01A | C3 |
| TCGA-BH-A0BA-01A | C3 |
| TCGA-BH-A18R-01A | C3 |
| TCGA-BH-A0DH-01A | C3 |
| TCGA-AR-A2LN-01A | C3 |
| TCGA-E2-A14R-01A | C3 |
| TCGA-BH-A203-01A | C3 |
| TCGA-BH-A0B4-01A | C3 |
| TCGA-AR-A2LO-01A | C3 |
| TCGA-E9-A1RC-01A | C3 |
| TCGA-E2-A10A-01A | C3 |
| TCGA-E9-A22H-01A | C3 |
| TCGA-AC-A2FB-01A | C3 |
| TCGA-E9-A22G-01A | C3 |
| TCGA-E2-A14P-01A | C3 |
| TCGA-E9-A22D-01A | C3 |
| TCGA-BH-A0C0-01A | C3 |
| TCGA-A2-A25B-01A | C3 |
| TCGA-E2-A14U-01A | C3 |
| TCGA-BH-A0C1-01B | C3 |
| TCGA-E2-A109-01A | C3 |
| TCGA-E2-A14N-01A | C3 |
| TCGA-D8-A27K-01A | C3 |
| TCGA-E9-A1R7-01A | C3 |
| TCGA-C8-A12Y-01A | C3 |
| TCGA-A8-A09E-01A | C3 |
| TCGA-A2-A0T3-01A | C3 |
| TCGA-BH-A0BV-01A | C3 |
| TCGA-E2-A1LG-01A | C3 |
| TCGA-A2-A0SX-01A | C3 |

|                  |    |
|------------------|----|
| TCGA-BH-A0HW-01A | C3 |
| TCGA-BH-A18U-01A | C3 |
| TCGA-BH-A0B8-01A | C3 |
| TCGA-AO-A0J4-01A | C3 |
| TCGA-EW-A2FS-01A | C3 |
| TCGA-EW-A1P3-01A | C3 |
| TCGA-BH-A0HA-01A | C3 |
| TCGA-E2-A1B0-01A | C3 |
| TCGA-AR-A2LK-01A | C3 |
| TCGA-A2-A0SU-01A | C3 |
| TCGA-BH-A1FL-01A | C3 |
| TCGA-AR-A0TY-01A | C3 |
| TCGA-D8-A13Y-01A | C3 |
| TCGA-A2-A0CX-01A | C3 |
| TCGA-AO-A03U-01B | C3 |
| TCGA-AO-A12F-01A | C3 |
| TCGA-AC-A2FG-01A | C3 |
| TCGA-A2-A0D3-01A | C3 |
| TCGA-BH-A0BM-01A | C3 |
| TCGA-BH-A0AU-01A | C3 |
| TCGA-A2-A04V-01A | C3 |
| TCGA-BH-A1FJ-01A | C3 |
| TCGA-AR-A2LM-01A | C3 |
| TCGA-PE-A5DD-01A | C3 |
| TCGA-AR-A0TX-01A | C3 |
| TCGA-AO-A0JF-01A | C3 |
| TCGA-AO-A03N-01B | C3 |
| TCGA-BH-A0DG-01A | C3 |
| TCGA-BH-A0DV-01A | C3 |
| TCGA-E2-A14Y-01A | C3 |
| TCGA-BH-A1EN-01A | C3 |
| TCGA-E2-A1IG-01A | C3 |
| TCGA-AR-A255-01A | C3 |
| TCGA-BH-A18M-01A | C3 |
| TCGA-B6-A1KI-01A | C3 |
| TCGA-AC-A23G-01A | C3 |
| TCGA-BH-A1FE-01A | C3 |
| TCGA-E2-A14T-01A | C3 |
| TCGA-E2-A1AZ-01A | C3 |
| TCGA-BH-A0BR-01A | C3 |
| TCGA-AO-A0JE-01A | C3 |
| TCGA-A2-A04Q-01A | C3 |
| TCGA-GM-A2DB-01A | C3 |

|                  |    |
|------------------|----|
| TCGA-BH-A0B0-01A | C3 |
| TCGA-BH-A0B6-01A | C3 |
| TCGA-BH-A0E9-01B | C3 |
| TCGA-GM-A2DC-01A | C3 |
| TCGA-AR-A1AO-01A | C3 |
| TCGA-AR-A1AX-01A | C3 |
| TCGA-GM-A2DK-01A | C3 |
| TCGA-E2-A1B1-01A | C3 |
| TCGA-BH-A1F5-01A | C3 |
| TCGA-B6-A0RT-01A | C3 |
| TCGA-AC-A2FF-01A | C3 |
| TCGA-AR-A252-01A | C3 |
| TCGA-AR-A1AU-01A | C3 |
| TCGA-AO-A12B-01A | C3 |
| TCGA-AR-A251-01A | C3 |
| TCGA-AR-A24N-01A | C3 |
| TCGA-B6-A0RS-01A | C3 |
| TCGA-B6-A1KF-01A | C3 |
| TCGA-A2-A04W-01A | C3 |
| TCGA-B6-A40B-01A | C3 |
| TCGA-AR-A1AK-01A | C3 |
| TCGA-A2-A25E-01A | C3 |
| TCGA-Z7-A8R6-01A | C3 |
| TCGA-AR-A0U4-01A | C3 |
| TCGA-A8-A08T-01A | C3 |
| TCGA-AR-A24R-01A | C3 |
| TCGA-BH-A1ES-01A | C3 |
| TCGA-AR-A24O-01A | C3 |
| TCGA-A2-A04R-01A | C3 |
| TCGA-AR-A1AH-01A | C3 |
| TCGA-AQ-A04L-01B | C3 |
| TCGA-AR-A0TP-01A | C3 |
| TCGA-B6-A0I2-01A | C3 |
| TCGA-AR-A24H-01A | C3 |
| TCGA-B6-A0RO-01A | C3 |
| TCGA-B6-A2IU-01A | C3 |
| TCGA-B6-A0WT-01A | C3 |
| TCGA-B6-A0RH-01A | C3 |
| TCGA-B6-A0IJ-01A | C3 |
| TCGA-B6-A0I5-01A | C3 |
| TCGA-A8-A06Z-01A | C4 |
| TCGA-AN-A04D-01A | C4 |
| TCGA-AC-A8OS-01A | C4 |

|                  |    |
|------------------|----|
| TCGA-BH-A0HL-01A | C4 |
| TCGA-AR-A24P-01A | C4 |
| TCGA-E9-A1R5-01A | C4 |
| TCGA-BH-A0DQ-01A | C4 |
| TCGA-UU-A93S-01A | C4 |
| TCGA-AQ-A0Y5-01A | C4 |
| TCGA-AN-A0FF-01A | C4 |
| TCGA-AN-A0FN-01A | C4 |
| TCGA-A2-A4RW-01A | C4 |
| TCGA-A1-A0SM-01A | C4 |
| TCGA-EW-A1IY-01A | C4 |
| TCGA-A7-A6VY-01A | C4 |
| TCGA-OL-A97C-01A | C4 |
| TCGA-A8-A079-01A | C4 |
| TCGA-A7-A6VW-01A | C4 |
| TCGA-E9-A2JT-01A | C4 |
| TCGA-BH-A8FY-01A | C4 |
| TCGA-E9-A1NI-01A | C4 |
| TCGA-D8-A1Y1-01A | C4 |
| TCGA-C8-A1HF-01A | C4 |
| TCGA-E2-A1IU-01A | C4 |
| TCGA-AC-A62V-01A | C4 |
| TCGA-A7-A426-01A | C4 |
| TCGA-A8-A097-01A | C4 |
| TCGA-D8-A1JF-01A | C4 |
| TCGA-C8-A1HO-01A | C4 |
| TCGA-AN-A0XO-01A | C4 |
| TCGA-C8-A134-01A | C4 |
| TCGA-D8-A1XU-01A | C4 |
| TCGA-A8-A0A4-01A | C4 |
| TCGA-D8-A27T-01A | C4 |
| TCGA-GM-A5PV-01A | C4 |
| TCGA-S3-AA17-01A | C4 |
| TCGA-A1-A0SD-01A | C4 |
| TCGA-D8-A27I-01A | C4 |
| TCGA-C8-A27B-01A | C4 |
| TCGA-LL-A5YO-01A | C4 |
| TCGA-LL-A5YN-01A | C4 |
| TCGA-D8-A1XG-01A | C4 |
| TCGA-D8-A1XF-01A | C4 |
| TCGA-LL-A6FR-01A | C4 |
| TCGA-D8-A73U-01A | C4 |
| TCGA-D8-A1X7-01A | C4 |

|                  |    |
|------------------|----|
| TCGA-AC-A5EH-01A | C4 |
| TCGA-UL-AAZ6-01A | C4 |
| TCGA-D8-A27N-01A | C4 |
| TCGA-A2-A25C-01A | C4 |
| TCGA-AR-A1AR-01A | C4 |
| TCGA-S3-AA15-01A | C4 |
| TCGA-LL-A9Q3-01A | C4 |
| TCGA-GM-A5PX-01A | C4 |
| TCGA-BH-A0BD-01A | C4 |
| TCGA-BH-A5IZ-01A | C4 |
| TCGA-A8-A07G-01A | C4 |
| TCGA-AQ-A7U7-01A | C4 |
| TCGA-AC-A2QI-01A | C4 |
| TCGA-LL-A7SZ-01A | C4 |
| TCGA-E2-A15P-01A | C4 |
| TCGA-E2-A1L9-01A | C4 |
| TCGA-A7-A13E-01A | C4 |
| TCGA-AO-A0J7-01A | C4 |
| TCGA-BH-A0HI-01A | C4 |
| TCGA-S3-AA0Z-01A | C4 |
| TCGA-A7-A26I-01B | C4 |
| TCGA-D8-A1XJ-01A | C4 |
| TCGA-E9-A1N6-01A | C4 |
| TCGA-OL-A5RZ-01A | C4 |
| TCGA-E2-A15C-01A | C4 |
| TCGA-AC-A23E-01A | C4 |
| TCGA-E2-A156-01A | C4 |
| TCGA-D8-A1X9-01A | C4 |
| TCGA-E9-A24A-01A | C4 |
| TCGA-A2-A0EX-01A | C4 |
| TCGA-OL-A5RY-01A | C4 |
| TCGA-LL-A440-01A | C4 |
| TCGA-A8-A09Q-01A | C4 |
| TCGA-A2-A0YD-01A | C4 |
| TCGA-BH-A0AY-01A | C4 |
| TCGA-OL-A6VO-01A | C4 |
| TCGA-OL-A5RX-01A | C4 |
| TCGA-A8-A08C-01A | C4 |
| TCGA-AC-A4ZE-01A | C4 |
| TCGA-EW-A1OY-01A | C4 |
| TCGA-EW-A1P7-01A | C4 |
| TCGA-BH-A0GY-01A | C4 |
| TCGA-A7-A0CJ-01A | C4 |



|                  |    |
|------------------|----|
| TCGA-A8-A08O-01A | C4 |
| TCGA-OL-A5D8-01A | C4 |
| TCGA-E9-A3Q9-01A | C4 |
| TCGA-E2-A1II-01A | C4 |
| TCGA-AR-A1AY-01A | C4 |
| TCGA-A2-A0D2-01A | C4 |
| TCGA-BH-A1FH-01A | C4 |
| TCGA-E2-A2P6-01A | C4 |
| TCGA-A2-A0ET-01A | C4 |
| TCGA-E9-A1NE-01A | C4 |
| TCGA-OL-A5RW-01A | C4 |
| TCGA-BH-A0HQ-01A | C4 |
| TCGA-A7-A0D9-01A | C4 |
| TCGA-A8-A08B-01A | C4 |
| TCGA-A8-A0AD-01A | C4 |
| TCGA-E9-A247-01A | C4 |
| TCGA-E9-A1NC-01A | C4 |
| TCGA-E2-A572-01A | C4 |
| TCGA-OL-A5RU-01A | C4 |
| TCGA-OL-A6VR-01A | C4 |
| TCGA-AR-A2LQ-01A | C4 |
| TCGA-E9-A22E-01A | C4 |
| TCGA-BH-A1EU-01A | C4 |
| TCGA-A8-A07B-01A | C4 |
| TCGA-A8-A08X-01A | C4 |
| TCGA-E2-A105-01A | C4 |
| TCGA-D8-A1XW-01A | C4 |
| TCGA-E2-A3DX-01A | C4 |
| TCGA-B6-A1KC-01B | C4 |
| TCGA-A8-A09I-01A | C4 |
| TCGA-A2-A3XX-01A | C4 |
| TCGA-E9-A1RI-01A | C4 |
| TCGA-A2-A0YI-01A | C4 |
| TCGA-A8-A09D-01A | C4 |
| TCGA-A2-A3Y0-01A | C4 |
| TCGA-AR-A24K-01A | C4 |
| TCGA-AR-A24W-01A | C4 |
| TCGA-E2-A15T-01A | C4 |
| TCGA-BH-A0B9-01A | C4 |
| TCGA-A8-A06T-01A | C4 |
| TCGA-AO-A12G-01A | C4 |
| TCGA-A8-A076-01A | C4 |
| TCGA-D8-A1JB-01A | C4 |

|                  |    |
|------------------|----|
| TCGA-BH-A18Q-01A | C4 |
| TCGA-BH-A1EW-01A | C4 |
| TCGA-E2-A15R-01A | C4 |
| TCGA-BH-A0AV-01A | C4 |
| TCGA-A2-A0EW-01A | C4 |
| TCGA-B6-A0IE-01A | C4 |
| TCGA-AO-A03T-01A | C4 |
| TCGA-E2-A152-01A | C4 |
| TCGA-AO-A12E-01A | C4 |
| TCGA-GM-A2DF-01A | C4 |
| TCGA-AC-A2FO-01A | C4 |
| TCGA-BH-A0BL-01A | C4 |
| TCGA-AR-A0TV-01A | C4 |
| TCGA-E2-A1LB-01A | C4 |
| TCGA-BH-A0DL-01A | C4 |
| TCGA-BH-A0DT-01A | C4 |
| TCGA-A2-A0EQ-01A | C4 |
| TCGA-BH-A0B7-01A | C4 |
| TCGA-GM-A2DI-01A | C4 |
| TCGA-AR-A1AW-01A | C4 |
| TCGA-AR-A2LJ-01A | C4 |
| TCGA-PE-A5DE-01A | C4 |
| TCGA-AR-A24L-01A | C4 |
| TCGA-AO-A1KP-01A | C4 |
| TCGA-AR-A1AL-01A | C4 |
| TCGA-AR-A0TQ-01A | C4 |
| TCGA-A2-A0CV-01A | C4 |
| TCGA-AR-A24V-01A | C4 |
| TCGA-A2-A0CR-01A | C4 |
| TCGA-GM-A2DL-01A | C4 |
| TCGA-B6-A0IP-01A | C4 |
| TCGA-B6-A0IB-01A | C4 |
| TCGA-A2-A0CK-01A | C4 |
| TCGA-B6-A0RV-01A | C4 |
| TCGA-B6-A0IA-01A | C4 |
| TCGA-B6-A0RU-01A | C4 |

**Supplementary Material S5: DMFS (Distant metastasis free survival) curve of AGO2, EIF4E3, and EIF4E**

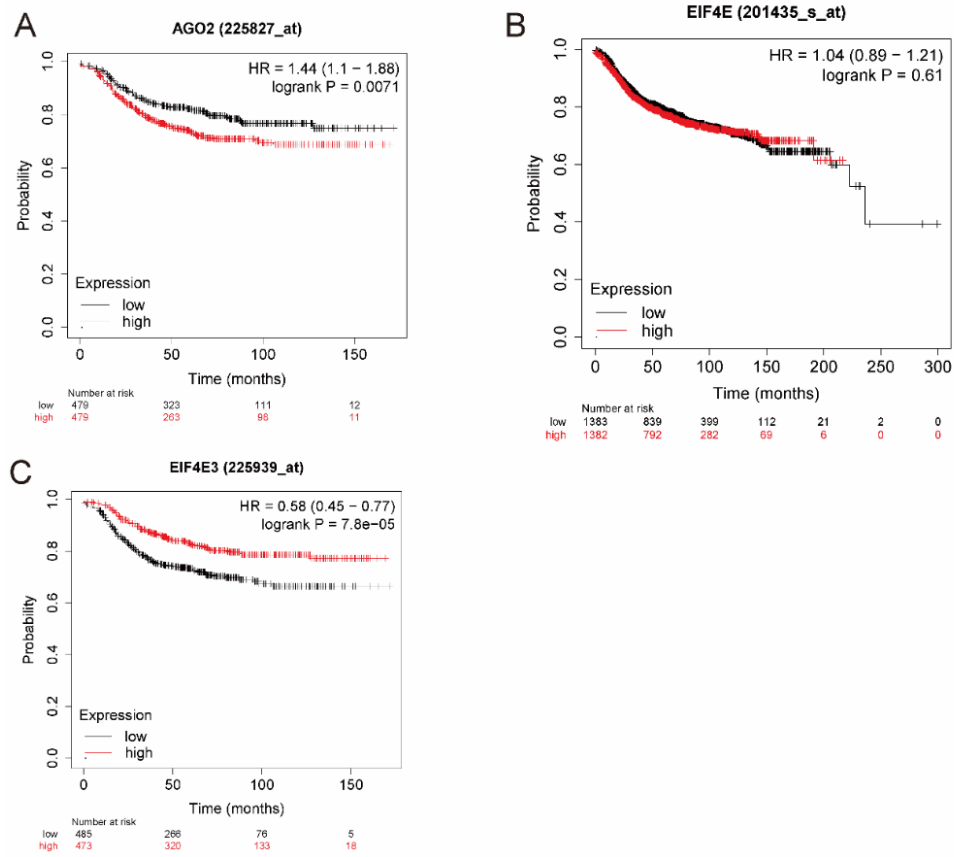

Figure 2 KM curve (DMFS) of AGO2 (A), EIF4E3 (B), and EIF4E (C).

**Supplementary Material S6: C index of nomogram**

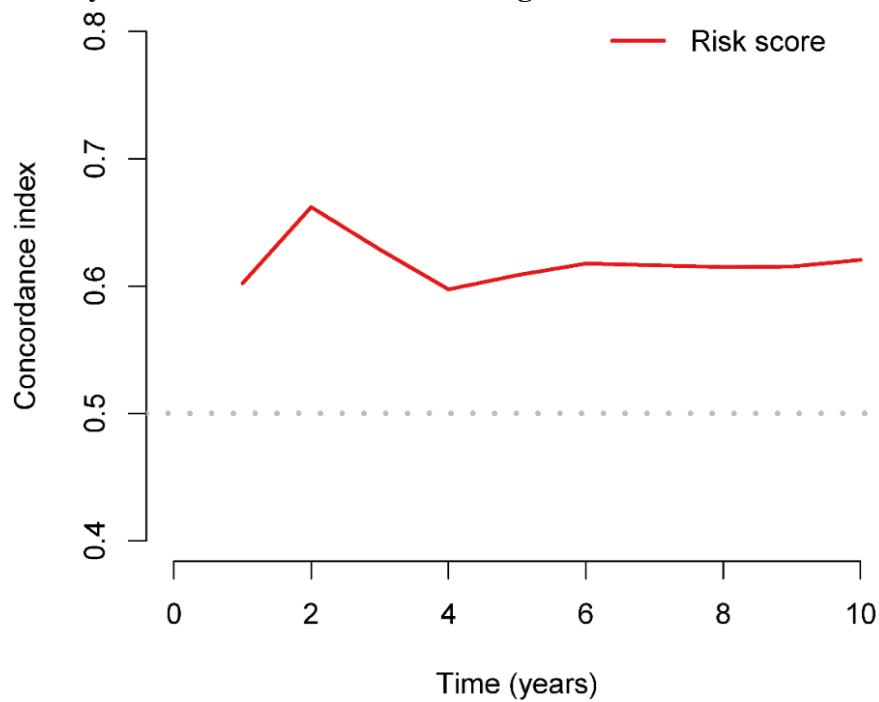

Figure 3 C index of nomogram

# Supplementary Material S7: The expression landscapes of AGO2, EIF4E3, DCPS, and EIF4E in different cell lines based on the CCLE database.

## AGO2

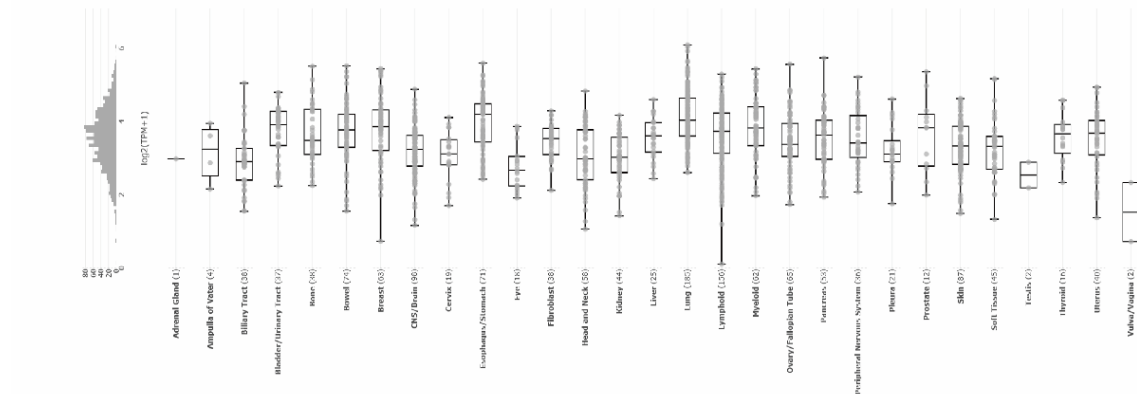

## DCPS

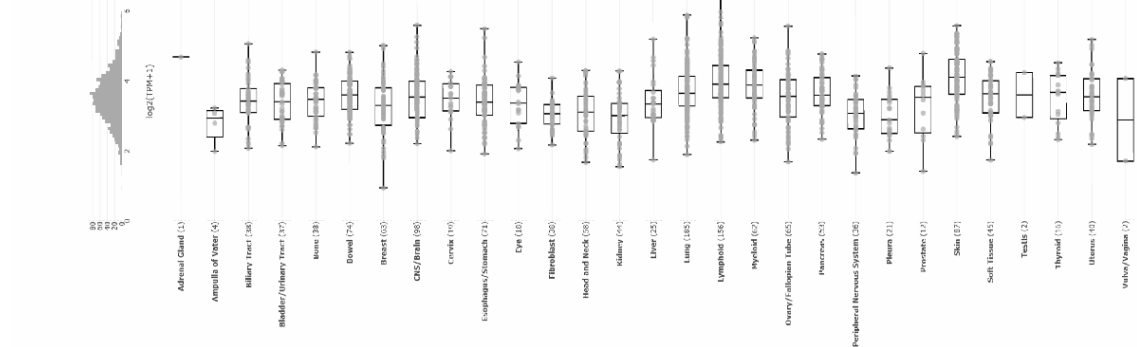

## EIF4E

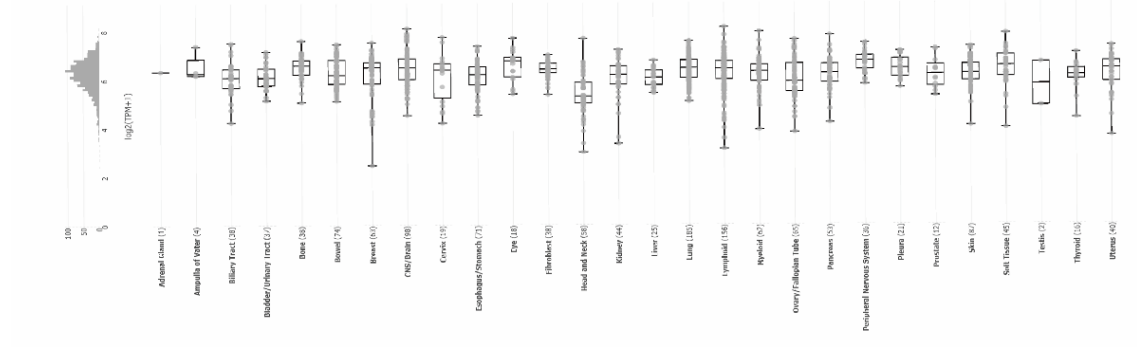

## EIF4E3

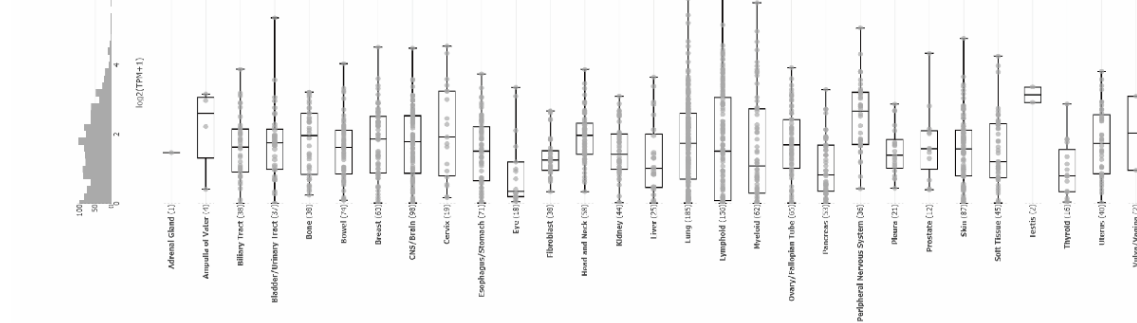

Figure 4 The expression landscapes of AGO2, EIF4E3, DCPS, and EIF4E in different cell lines based on the CCLE database.
